# Supplementary material
Source: Research Square preprint supplement (doi:10.21203/rs.3.rs-8803488/v1)
Supplement: Supplementary file 1 [file 25fc5e97bc0bdf81330cac43.docx]

***Supplementary Tables and Figures***

***Supplementary Tables***

**Supplementary Table S1. pCyTOF whole blood staining panel**

| **Metal label** | **Specificity** | **Clone** | **Supplier** | **Cat#** | **Cocktail** |
| --- | --- | --- | --- | --- | --- |
| **89Y** | CD45 | HI30 | Standard BioTools | 3089003B | Boyle surface-frozen |
| **141Pr** | CD7 | CD7-6B7 | Biolegend | 343111 | HIMC surface-frozen |
| **142Nd** | CD19 | HIB19 | Standard BioTools | 3142001B | HIMC surface-frozen |
| **143Nd** | CD45RA | HI100 | Standard BioTools | 3143006B | Boyle surface-liquid drop-in |
| **144Nd** | pPLCg2 | K86-689.37 | Standard BioTools | 3144015A | HIMC-intracellular-frozen |
| **145Nd** | CD4 | RPA-T4 | Standard BioTools | 3145001B | HIMC surface-frozen |
| **146Nd** | IgD | IA6-2 | Standard BioTools | 3146005B | HIMC surface-frozen |
| **147Sm** | CD20 | 2H7 | Standard BioTools | 3147007B | HIMC surface-frozen |
| **148Nd** | IgA | Polyclonal | Standard BioTools | 3148007B | Boyle surface-frozen |
| **149Sm** | CD25 | 2A3 | Standard BioTools | 3149010B | HIMC surface-frozen |
| **150Nd** | pSTAT5 | 47 | Standard BioTools | 3150005A | HIMC-intracellular-frozen |
| **151Eu** | CD123 | 6H6 | Standard BioTools | 3151001B | HIMC surface-frozen |
| **152Sm** | Akt | D9E | Standard BioTools | 3152005A | HIMC-intracellular-frozen |
| **153Eu** | pSTAT1 | 4a | Standard BioTools | 3153005A | HIMC-intracellular-frozen |
| **154Sm** | CD127 | R34-34 | Novus Biological | DDX0700P-100 | Boyle surface-frozen |
| **155Gd** | CD27 | L128 | Standard BioTools | 3155001B | HIMC surface-frozen |
| **156Gd** | pP38 | D3F9 | Standard BioTools | 3156002A | HIMC-intracellular-frozen |
| **158Gd** | pSTAT3 | 4 | Standard BioTools | 3158005A | HIMC-intracellular-frozen |
| **159Tb** | CD11c | Bu15 | Standard BioTools | 3159001B | HIMC surface-frozen |
| **160Gd** | CD14 | M5E2 | Standard BioTools | 3160001B | HIMC surface-frozen |
| **162Dy** | CD66b | 80H3 | Standard BioTools | 3162023B | Boyle surface-frozen |
| **163Dy** | CD56 | NCAM16.2 | Standard BioTools | 3163007B | HIMC surface-frozen |
| **164Dy** | IkBalpha | L35A5 | Standard BioTools | 3164004A | HIMC-intracellular-frozen |
| **165Ho** | CD16 | B73.1 | Standard BioTools | 3167001B | Boyle surface-frozen |
| **167Er** | CD38 | HIT2 | Standard BioTools | 3168002B | HIMC surface-frozen |
| **168Er** | CD8 | SK1 | Standard BioTools | 3169010B | HIMC surface-frozen |
| **169Tm** | CD33 | WM53 | Standard BioTools | 3170001B | Boyle surface-frozen |
| **170Er** | CD3 | UCHT1 | Standard BioTools | 3167001B | HIMC surface-frozen |
| **171Yb** | pERK 1/2 | D13.14.4E | Standard BioTools | 3171010A | HIMC-intracellular-frozen |
| **172Yb** | Ki67 | B56 | Standard BioTools | 3172024B | Boyle-intracellular-frozen |
| **173Yb** | CD21 | Bu32 | Biolegend | 354902 | Boyle surface-frozen |
| **174Yb** | HLA-DR | L243 | Standard BioTools | 3174001B | HIMC surface-frozen |
| **175Lu** | pS6 | N7548 | Standard BioTools | 3175009A | HIMC-intracellular-frozen |
| **176Yb** | CREB | 87G3 | Standard BioTools | 3176005A | Boyle-intracellular-frozen |
| **209Bi** | CD11b | ICRF44 | Standard BioTools | 3209003B | Boyle surface-frozen |

**Supplementary Table S2: PBMC immunophenotyping CyTOF panel**

| **Metal label** | **Specificity** | **Clone** | **Supplier** | **Cat#** | **Cocktail** |
| --- | --- | --- | --- | --- | --- |
| **113In** | CD57 | HNK-1 | Biolegend | 359602 | HIMC frozen |
| **115In** | live/dead |  |  |  |  |
| **141Pr** | CCR6 | G034E3 | Standard BioTools | 3141003A | Boyle frozen |
| **142Nd** | CD19 | SJ25C1 | Biolegend | 363002 | HIMC frozen |
| **143Nd** | CD4 | SK3 | Biolegend | 344602 | HIMC frozen |
| **144Nd** | CD8 | SK1 | Biolegend | 344702 | HIMC frozen |
| **145Nd** | CD39 | A1 | Biolegend | 328202 | HIMC frozen |
| **146Nd** | IgD | IA6-2 | Biolegend | 348202 | HIMC frozen |
| **147Sm** | CD85j | 292319 | R&D Systems | MAB20172 | HIMC frozen |
| **148Nd** | CD11c | Bu15 | Biolegend | 337202 | HIMC frozen |
| **149Sm** | CD16 | 3G8 | Biolegend | 302002 | HIMC frozen |
| **150Nd** | CD3 | UCHT1 | Biolegend | 300402 | HIMC frozen |
| **151Eu** | CD38 | HB-7 | Biolegend | 356602 | HIMC frozen |
| **152Sm** | CD27 | L128 | BD Biosciences | special order | HIMC frozen |
| **153Eu** | CD21 | Bu32 | Biolegend | 354902 | Boyle frozen |
| **154Sm** | CD14 | M5E2 | Biolegend | 301802 | HIMC frozen |
| **155Gd** | Vd2 TCR | B6 | Biolegend | 331402 | Boyle frozen |
| **156Gd** | CD94 | HP-3D9 | BD Biosciences | 555887 | HIMC frozen |
| **157Gd** | CD86 | IT2.2 | Biolegend | 305402 | HIMC frozen |
| **158Gd** | CXCR5 | RF8B2 | BD Biosciences | 552032 | HIMC frozen |
| **159Tb** | CXCR3 | G025H7 | Biolegend | 353702 | HIMC frozen |
| **160Gd** | CCR7 | 150503 | R&D Systems | MAB197 | HIMC frozen |
| **162Dy** | CD45RA | HI100 | Biolegend | 304102 | HIMC frozen |
| **164Dy** | CD20 | 2H7 | Biolegend | 302302 | HIMC frozen |
| **165Ho** | CD127 | A019D5 | Biolegend | 351302 | HIMC frozen |
| **166Er** | CD33 | P67.6 | Biolegend | 366602 | HIMC frozen |
| **167Er** | LAG3 | 11C3C65 | Biolegend | 369302 | Boyle frozen |
| **168Er** | CD49b | P1E6-C5 | Biolegend | 359302 | Boyle frozen |
| **169Tm** | ICOS | DX29 | BD Biosciences | 557801 | HIMC frozen |
| **170Er** | CD161 | DX12 | BD Biosciences | 556079 | HIMC frozen |
| **171Yb** | TCRgd | B1 | Biolegend | 331202 | HIMC frozen |
| **172Yb** | PD-1 | EH12.1 | BD Biosciences | 562138 | HIMC frozen |
| **173Yb** | CD123 | 9F5 | BD Biosciences | 555642 | HIMC frozen |
| **174Yb** | CD56 | NCAM16.2 | BD Biosciences | 559043 | HIMC frozen |
| **175Lu** | HLA-DR | G46-6 | BD Biosciences | 556642 | HIMC frozen |
| **176Yb** | CD25 | M-A251 | Biolegend | 356102 | HIMC frozen |
| **209Bi** | CD11b | ICRF44 | Standard BioTools | 3209003B | Boyle frozen |

**Supplementary Table 3: PBMC CD4 T cells, Tr1 coinhibitory flow cytometry panel**

| **Target** | **Flurophor** | | **Clone** | **Source** | **Dilution** |  | **Catalogue #** |
| --- | --- | --- | --- | --- | --- | --- | --- |
| *Pre-Stain* | | |  |  |  |  |  |
| LAG3 | Alexa Fluor 647 | | 11C3C65 | Biolegend | 1/50 |  | 369304 |
| CCR2 | APC-Cy7 | | K036C2 | Biolegend | 1/120 |  | 357220 |
| CCR5 | BV 650 | | 3A9 | BD Biosciences | 1/80 |  | 564999 |
| TIGIT | PE Dazzle | | VSTM3 | Biolegend |  |  | 372716 |
| TIM3 | BV605 | | F38-2E2 | Thermo Fisher | 1/100 |  | 16-3109-85 |
| *Surface Stain* | | |  |  |  |  |  |
| CD161 | Alexa Fluor 700 | | HP-3G10 | Biolegend | 1/200 |  | 339942 |
| CD45RA | BUV 563 | | HI100 | BD Biosciences | 1/800 |  | 565702 |
| CD4 | BUV 737 | | SK3 | BD Biosciences | 1/120 |  | 564305 |
| CD8 | BUV 496 | | RPA-T8 | BD Biosciences | 1/800 |  | 612942 |
| CD3 | BUV 805 | | SK7 | BD Biosciences | 1/500 |  | 612893 |
| CXCR3 | BV421 | | IC6/CXCR3 | BD Biosciences | 1/100 |  | 562558 |
| CD38 | BV480 | | HIT2 | BD Biosciences | 1/50 |  | 566137 |
| CD14 | BV510 | | M5E2 | Biolegend | 1/100 |  | 301842 |
| CD19 | BV510 | | SJ25C1 | Biolegend | 1/100 |  | 363020 |
| CD127 | BV570 | | A019D5 | Biolegend | 1/50 |  | 351308 |
| CXCR5 | BV711 | | J252D4 | Biolegend | 1/50 |  | 356934 |
| ICOS | BV750 | | C398.4A | Biolegend | 1/100 |  | 313558 |
| CD49b | FITC | | Y418 | Invitrogen | 1/100 |  | 11-0498-42 |
| PD1 | PE/Cy7 | | EH12.1 | BD Biosciences | 1/100 |  | 561272 |
| CD16 | PE/Fire 640 | | 3G8 | Biolegend | 1/200 |  | 302068 |
| CD25 | PE/Fire 700 | | M-A251 | Biolegend | 1/100 |  | 356146 |
| CCR7 | PerCP Cy5.5 | | 150503 | BD Biosciences | 1/80 |  | 561144 |
| *Intra-cellular Stain* | | |  |  |  |  |  |
| CTLA-4 | | BV750 | BNI3 | BD Biosciences | 1/120 |  | 563931 |
| Ki67 | | BUV395 | B56 | BD Biosciences | 1/200 |  | 564071 |
| NKG7 | | PE | 2G9A10F5 | Beckman Coulter | 1/2000 |  | IM3293 |

**Supplementary Table 4: Antigen-induced marker assay flow cytometry panel**

| **Antibody** | | **Clone** | **Source** | **Dilution** | **Catalogue Number** |
| --- | --- | --- | --- | --- | --- |
| *Pre-Stain* | |  |  |  |  |
| LAG3 | BV421 | T47-530 | BD Biosciences | 1/50 | 565720 |
| CD49b | FITC | Y418 | Invitrogen | 1/100 | 11-0498-42 |
| CCR7 | PerCP Cy5.5 | G043H7 | Biolegend | 1/25 | 353220 |
| *Surface Stain* | |  |  |  |  |
| CD161 | AF700 | HP-3G10 | Biolegend | 1/50 | 339942 |
| OX40 | APC | ACT35 | BD Biosciences | 1/50 | 563473 |
| CD45RA | BUV563 | HI100 | BD Biosciences | 1/400 | 565702 |
| CD8 | BUV496 | RPA-T8 | BD Biosciences | 1/100 | 612942 |
| CD3 | BUV805 | SK7 | BD Biosciences | 1/50 | 612893 |
| CD69 | BUV737 | FN50 | BD Biosciences | 1/100 | 612817 |
| CD14 | BV510 | M5E2 | Biolegend | 1/100 | 301842 |
| CD19 | BV510 | HIB19 | Biolegend | 1/100 | 302241 |
| CCR4 | BV605 | L291H4 | Biolegend | 1/100 | 359418 |
| CCR6 | BV650 | 11A9 | BD Biosciences | 1/50 | 563922 |
| CXCR5 | BV711 | J252D4 | Biolegend | 1/50 | 356934 |
| CD4 | BV785 | OKT4 | Biolegend | 1/50 | 317442 |
| CD25 | PE | BC96 | Biolegend | 1/200 | 302906 |
| PD1 | PE/Cy7 | EH12.1 | BD Biosciences | 1/50 | 561272 |

**Supplementary Table 5: scRNAseq participant characteristics and parasitemia at time of ruxolitinib or placebo administration. BMI, body mass index.**

|  | All (n=8) | Ruxolitinib (n=4) | Placebo (n=4) |
| --- | --- | --- | --- |
| Male sex, n (%) | 4 (50) | 3 (75) | 1 (25) |
| Age, years (median, range) | 28 (18-39) | 35 (21-39) | 27 (18-29) |
| BMI, Kg/m2 (median, range) | 23 (20-31) | 26 (20-31) | 22 (20-28) |
| Race white, n (%) | 6 (75) | 2 (50) | 4 (100) |
| Parasitemia, parasites/ml (geometric mean, range) | 15320 (1387-121691) | 10041 (4772-37107) | 23373 (1387-121691) |

**Supplementary Table 6: Antibodies used to stain cells for scRNAseq**

| **Antibody** | | **Clone** | **Source** | **Dilution** | **Catalogue Number** |
| --- | --- | --- | --- | --- | --- |
| *Surface Stain* | |  |  |  |  |
| *Ex vivo dataset:* | |  |  |  |  |
| CD3 | BV510 | SK7 | Biolegend | 1/50 | 344828 |
| CD4 | AF647 | SK3 | Biolegend | 1/100 | 344636 |
| CD45RA | BB515 | HI100 | BD Biosciences | 1/400 | 564552 |
| CD19 | PE | H1B19 | Biolegend | 1/100 | 302208 |
| *AIM dataset:* | |  |  |  |  |
| CD3 | AF700 | SK7 | Biolegend | 1/50 | 344822 |
| CD4 | PerCP Cy5.5 | OKT4 | Biolegend | 1/50 | 317428 |
| CD69 | PE | FN50 | Biolegend | 1/50 | 310906 |
| OX40 | APC | ACT35 | BD Biosciences | 1/50 | 563473 |
| *Hashtags* | |  |  |  |  |
| TotalSeq-C0251 anti-human Hashtag 1 | | LNH-94; 2M2 | Biolegend | 0.3ug/sample | 394661 |
| TotalSeq-C0252 anti-human Hashtag 2 | | LNH-94; 2M2 | Biolegend | 0.3ug/sample | 394663 |
| TotalSeq-C0253 anti-human Hashtag 3 | | LNH-94; 2M2 | Biolegend | 0.3ug/sample | 394665 |
| TotalSeq-C0254 anti-human Hashtag 4 | | LNH-94; 2M2 | Biolegend | 0.3ug/sample | 394667 |
| TotalSeq-C0255 anti-human Hashtag 5 | | LNH-94; 2M2 | Biolegend | 0.3ug/sample | 394669 |
| TotalSeq-C0256 anti-human Hashtag 6 | | LNH-94; 2M2 | Biolegend | 0.3ug/sample | 394671 |
| TotalSeq-C0257 anti-human Hashtag 7 | | LNH-94; 2M2 | Biolegend | 0.3ug/sample | 394673 |
| TotalSeq-C0258 anti-human Hashtag 8 | | LNH-94; 2M2 | Biolegend | 0.3ug/sample | 394675 |
| TotalSeq-C0259 anti-human Hashtag 9 | | LNH-94; 2M2 | Biolegend | 0.3ug/sample | 394677 |
| TotalSeq-C0260 anti-human Hashtag 10 | | LNH-94; 2M2 | Biolegend | 0.3ug/sample | 394679 |
| TotalSeq-C0296 anti-human Hashtag 11 | | LNH-94; 2M2 | Biolegend | 0.3ug/sample | 328941 |
| TotalSeq-C0262 anti-human Hashtag 12 | | LNH-94; 2M2 | Biolegend | 0.3ug/sample | 394683 |
| TotalSeq-C0263 anti-human Hashtag 13 | | LNH-94; 2M2 | Biolegend | 0.3ug/sample | 394685 |
| TotalSeq-C0264 anti-human Hashtag 14 | | LNH-94; 2M2 | Biolegend | 0.3ug/sample | 394687 |
| TotalSeq-C0265 anti-human Hashtag 15 | | LNH-94; 2M2 | Biolegend | 0.3ug/sample | 394689 |
| TotalSeq-C0276 anti-human Hashtag 16 | | LNH-94; 2M2 | Biolegend | 0.3ug/sample | 394691 |
| TotalSeq-C0277 anti-human Hashtag 17 | | LNH-94; 2M2 | Biolegend | 0.3ug/sample | 394621 |
| TotalSeq-C0277 anti-human Hashtag 18 | | LNH-94; 2M2 | Biolegend | 0.3ug/sample | 394693 |
| TotalSeq-C0279 anti-human Hashtag 19 | | LNH-94; 2M2 | Biolegend | 0.3ug/sample | 394695 |

***Supplementary Figures***

***Supplementary Figure 1:******Analysis of phosphoproteins in CD4 T cells during malaria.***

***A****. Mean Signal Intensity (MSI) of phosphorylated proteins in CD4+ T cells following stimulation of whole blood with PBS (un-stimulated condition), IFNβ, IL-2 and PMA/Ionomycin at the pre-inoculation (baseline) time point for 15 minutes. The box plots show the extent of the lower and upper quartiles and the median, while each point represents a study participant (n=20).* ***B.*** *Volcano Plots showing the coefficient and p values of mixed model analysis of the effect of infection (pre-treatment time point (T, day 8/9) compared to inoculation time point (I, day 0)), on the mean signal intensity (MSI) of the phosphorylated proteins and Ki67 in CD4+ T cell subsets in unstimulated cells. Proteins with a significant change are in red.* ***C-F.*** *Coefficient from mixed effect models analysing MSI for phosphoproteins in unstimulated cells in indicated CD4 T cell subset, analysing changes with time (****C/E)****, comparing T with T+1.5 and T+5 and for the interaction between timepoint and treatment* ***(D/F****). Coefficient is indicated for each subset and timepoint, with significant changes in red. Related to Figure 1*

***Supplementary Figure 2:******pSTATs in CD4 T cells during malaria following IFN and IL-2 stimulations.***

***A)*** *Coefficient from mixed effect models analysing MSI for phosphoproteins in cells stimulated with IFN in indicated CD4 T cell subset, analysing changes with time (****A)*** *comparing T with T+1.5 and T+5 and for the interaction between timepoint and treatment* ***(B****). Coefficient is indicated for each subset and timepoint, with significant changes in red.* ***C)*** *pSTAT5 expression in CD4 T cells at I, T, T+1, T+5 in IL-2 stimulated cultures. Data are log transformed median signalling intensity, with thin lines representing each participant and coloured by treatment group. Prior to randomisation data are in grey; following randomisation ruxolitinib-treated participants are red and placebo-treated are blue. TX is p values for the interaction term between each timepoint (compared to T) and treatment groups. p values for the comparison between each timepoint and T are shown for the placebo (PBO) and ruxolitinib (RUX) groups, and were determined from contrasts.* ***D)*** *Coefficient from mixed effect models analysing MSI for pSTAT5 in cells stimulated with IL-2 in indicated CD4 T cell subset, analysing changes with time comparing T with T+1.5 and T+5 and for the interaction between timepoint and treatment. Significant changes are indicated in red.* ***E)*** *Fold change between T and T+1.5 expression of pSTAT5 in total CD4 T cells and CD4 T cell subsets for IL-2 stimulated cells. Data for each participant are shown. Related to Figure 1*

***Supplementary Figure 3:******Phosphorylation of proteins in PMA stimulated cultures in CD4 T cells during malaria.***

***A)*** *Coefficient from mixed effect models analysing MSI for pCREB, pERK and pS6 in cells stimulated with PMA/Ion in indicated CD4 T cell subset, analysing changes with time comparing T with T+1.5 and T+5 and for the interaction between timepoint and treatment. Significant changes are indicated in red.* ***B)*** *Fold change between T and T+1.5 expression of pERK and pCREB in total CD4 T cells and CD4 T cell subsets for PMA/Ion stimulated cells. Data for each participant are shown. Related to Figure 1*

***Supplementary Figure 4: CD4 T cell frequencies and activation***

***A)*** *PBMCs were collected at 5 time points in first and second infection. *one participant in the Rux group in second infection tested positive for COVID-19 and received malaria treatment early.* ***B/C)*** *PBMCs were analysed by CyTOF and CD4 T cells identified for further analysis.* ***D/E)*** *CD38+ICOS+ Th1, and CD38+PD1+ICOS+ Tfh2 and Tfh1 CD4 T cells in first and second infection. Data are log10 frequencies of CD4 T cells, with thin lines representing each participant. Prior to randomisation data are in grey, following randomisation ruxolitinib-treated participants are in red and placebo-treated are in blue. P values are from linear mixed effect models, with bold lines representing the mean of the predicted values from the fitted models for each group. TX is p values for the interaction term between each timepoint (compared to T) and treatment groups (underlined in green). P values for the comparison between each timepoint and T are shown for the placebo (PBO, underlined in blue) and ruxolitinib (RUX, underlined in red) groups, and were determined from contrasts. Related to Figure 2.*

***Supplementary Figure 5: Tr1 cell analysis strategy***

***A)*** *CD4+ T cells were identified based on FSC/SSC, live/dead staining, CD14-CD19-/CD3+, CD4+ cells.* ***B)*** *CD4+ cells were exported after gating and analysed in R. Batch correction was performed in cyCombine, Treg cells removed (CD25+CD127low), and Tr1 cells identified based on LAG3+CD49b+. Related to Figure 3.*

***Supplementary Figure 6: Gating Strategy employed to identify the AIM+ CD4+ T cell populations***

*After gating for the CD45RA+ CCR7+ naive cells, a “not” gate was used to remove this population and the other CD4+ T cell subsets were identified from the non-naive CD4+ T cells. Following this, Boolean gating was using to examine AIM+ CD4+ T cells. Figure represents PBMCs from Day 15 for D726 in the Placebo group following 18 hour culture with parasitised red blood cells. AND gates were set to analyse all AIM+ cells and subset. Related to Figure 4.*

***Supplementary Figure 7: AIM+ CD4 T cell response during first and second infection***

*Parasite specific CD4 T cells were identified using Activation Induced Marker assay at inoculation (I), treatment (T) and post treatment timepoints (T+3, T+7 and T+20) in first infection, and at re-inoculation (rI), re-treatment (rT) and post treatment timepoints (rT+3, rT+7, EOS) in second infection.* ***A.*** *Coefficient of linear mixed models comparing first to second infection inoculation (I verse rI) interaction term of ruxolitinib treatment group. Only AIM+ Tfh1 cells were elevated at rI, and this was not impacted by ruxolitinib.* ***B/C)*** *AIM+ Th2, AIM+ Tfh (total Tfh) and AIM+ Tfh2, and AIM+Tfh-Tr1 cells in first and second infection. Data are log10 frequencies of malaria specific AIM+ CD4 T cells, with thin lines representing each participant. Prior to randomisation is in grey, following randomisation ruxolitinib-treated participants are red and placebo are blue. P values are from linear mixed effect models, with bold lines representing the mean of the predicted values from the fitted models for each group. TX is p values for the interaction term between each timepoint (compared to T) and treatment groups (underlined in green). P values for the comparison between each timepoint and T are shown for the placebo (PBO, underlined in blue) and ruxolitinib (RUX, underlined in red) groups, which were determined from contrasts. P value for the difference at rT between placebo and ruxolitinib group, calculated from the intercept is shown at rT.*

***
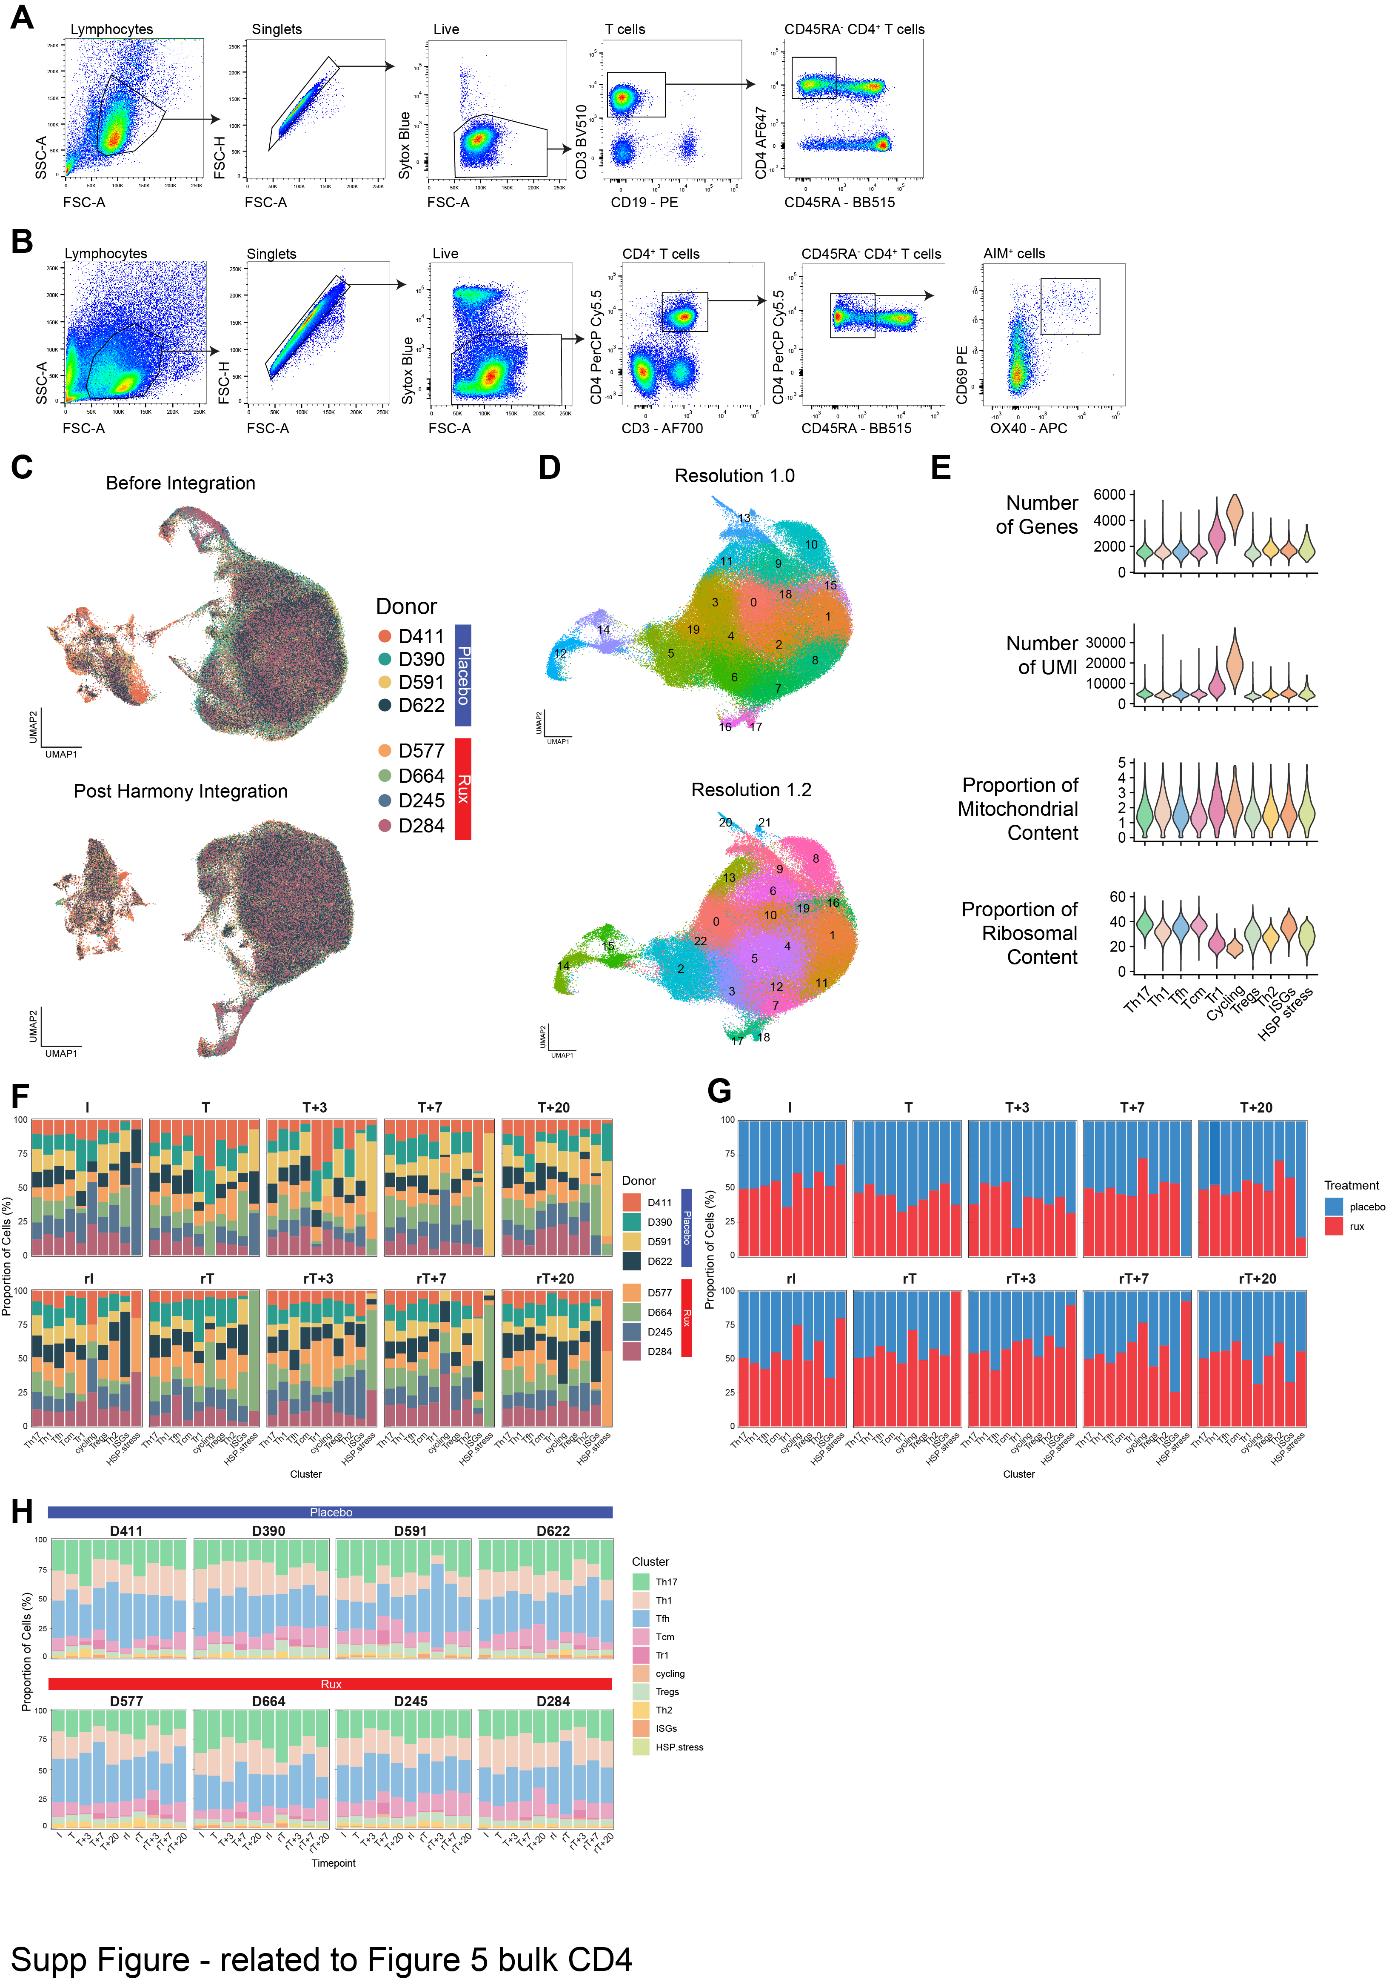
***

***Supplementary Figure 8: scRNAseq analysis of CD4+ T cell responses during first and second infection. A)*** *Flow cytometry gating strategy for isolating ex vivo antigen experienced (CD45RA-) CD4+ T cells and* ***B)*** *AIM+ (CD69+OX40+) CD4+ T cells.* ***C)*** *UMAP visualisation of ex vivo and AIM+ CD4+ T cells coloured by donor prior to and post-Harmony integration by donor.* ***D)*** *UMAP visualisation showing clustering of the ex vivo CD4+ T cells at resolution 1 and 1.2.* ***E)*** *Violin plots showing quality control metrics for the ex vivo CD4+ T cells.* ***F)*** *Stacked bar graphs split by timepoint showing the proportion of donor or* ***G)*** *treatment group per ex vivo CD4+ T cell cluster.* ***H)*** *Stacked bar graphs split by donor showing the proportion of ex vivo CD4+ T cell cluster per timepoint.*

***
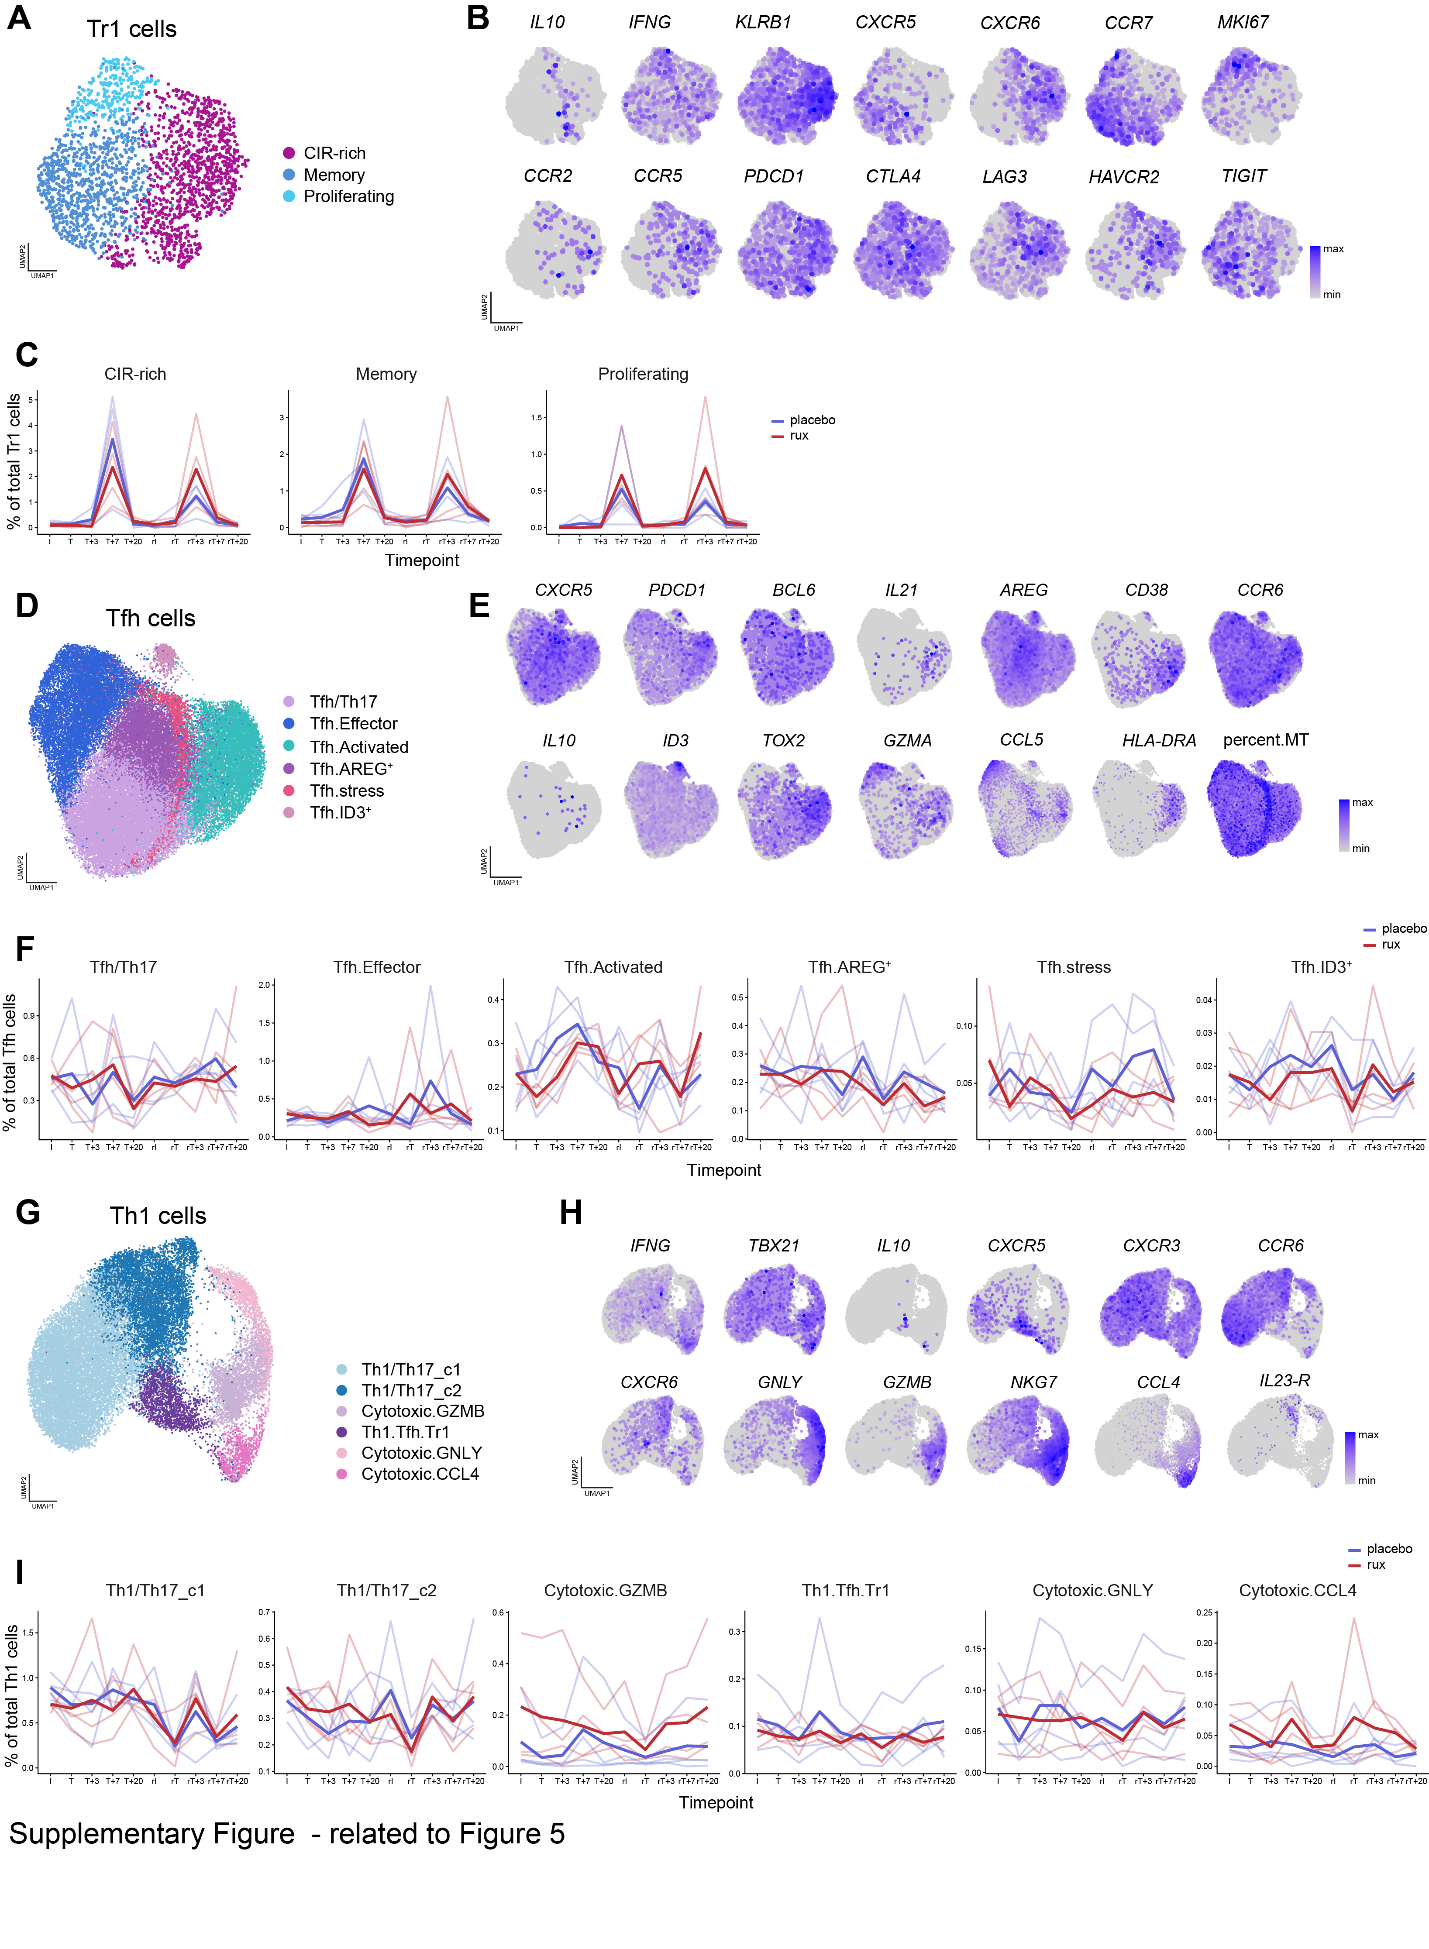
***

***Supplementary Figure 9: scRNAseq Th1-Tfh-Tr1 axis cells re-clustering.***

***A)*** *UMAP visualisation shows three clusters of Tr1 cells after subsetting and re-clustering and* ***B)*** *expression of select cluster marker genes.* ***C)*** *Line graphs showing the cluster frequency as a percentage of total Tr1 cells during first and second infections. Lines are coloured by treatment group, with bold lines representing group means and transparent lines showing frequencies for each participant.* ***D)*** *UMAP visualisation shows six clusters of Tfh cells after subsetting and re-clustering and* ***E)*** *expression of select cluster marker genes.* ***F)*** *Line graphs showing the cluster frequency as a percentage of total Tfh cells during first and second infections. Lines are coloured by treatment group, with bold lines representing group means and transparent lines showing frequencies for each participant.* ***G)*** *UMAP visualisation shows six clusters of Th1 cells after subsetting and re-clustering and* ***H)*** *expression of select cluster marker genes.* ***I)*** *Line graphs showing the cluster frequency as a percentage of total Th1 cells during first and second infections. Lines are coloured by treatment group, with bold lines representing group means and transparent lines showing frequencies for each participant.*

***Supplementary Figure 10: AIM+ scRNAseq data and malaria specific cells.***

***A)*** *UMAP visualisation showing clustering of the AIM+ CD4+ T cells.* ***B)*** *Violin plots showing quality control metrics for the AIM+ CD4+ T cells.* ***C)*** *Upset plot showing the number of shared marker genes between clusters in AIM+ data set. The bar graph on the right shows the total number of differentially expressed cluster marker genes for each subset.* ***D)*** *Subset proportions of AIM+ CD4 T cells at each timepoint, by treatment group.* ***E)*** *Subset proportions of malaria-specific cells identified within ex vivo data set based on TCR analysis of AIM+ data set.*
